# Supplementary material
Source: PubMed Central journal article supplement (PMC5129706)
Supplement: supp_pp.16.00889_PP2016-00889R2_Supplemental_Material.pdf [file supp_pp.16.00889_PP2016-00889R2_Supplemental_Material.pdf]

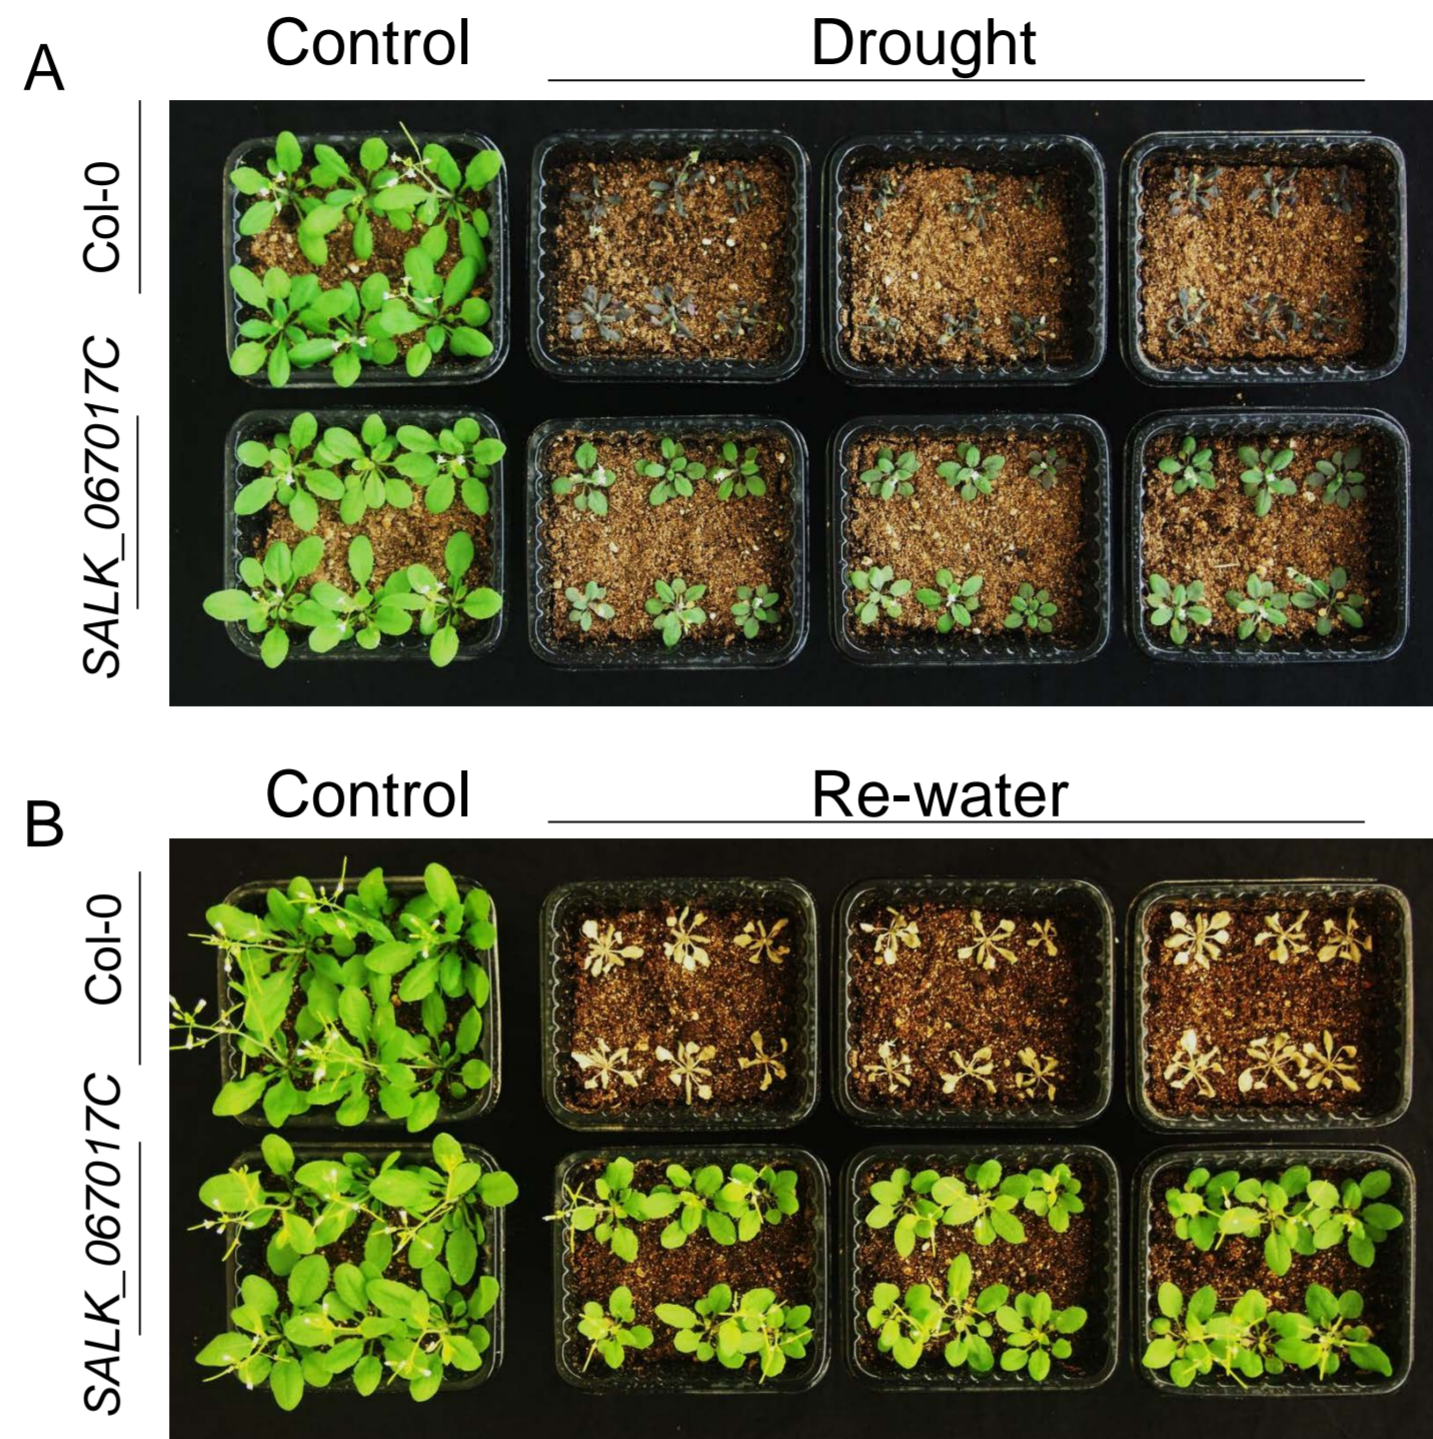

**Supplemental Figure 1. Drought resistance assay of SALK\_067017C**

(A) Col-0 wild type and SALK\_067017C plants were grown under normal conditions with 16-h-light / 8-h-dark for 21 days and then drought stressed for 7 days. (B) Re-watered for 3 days. Control, well-watered plants.

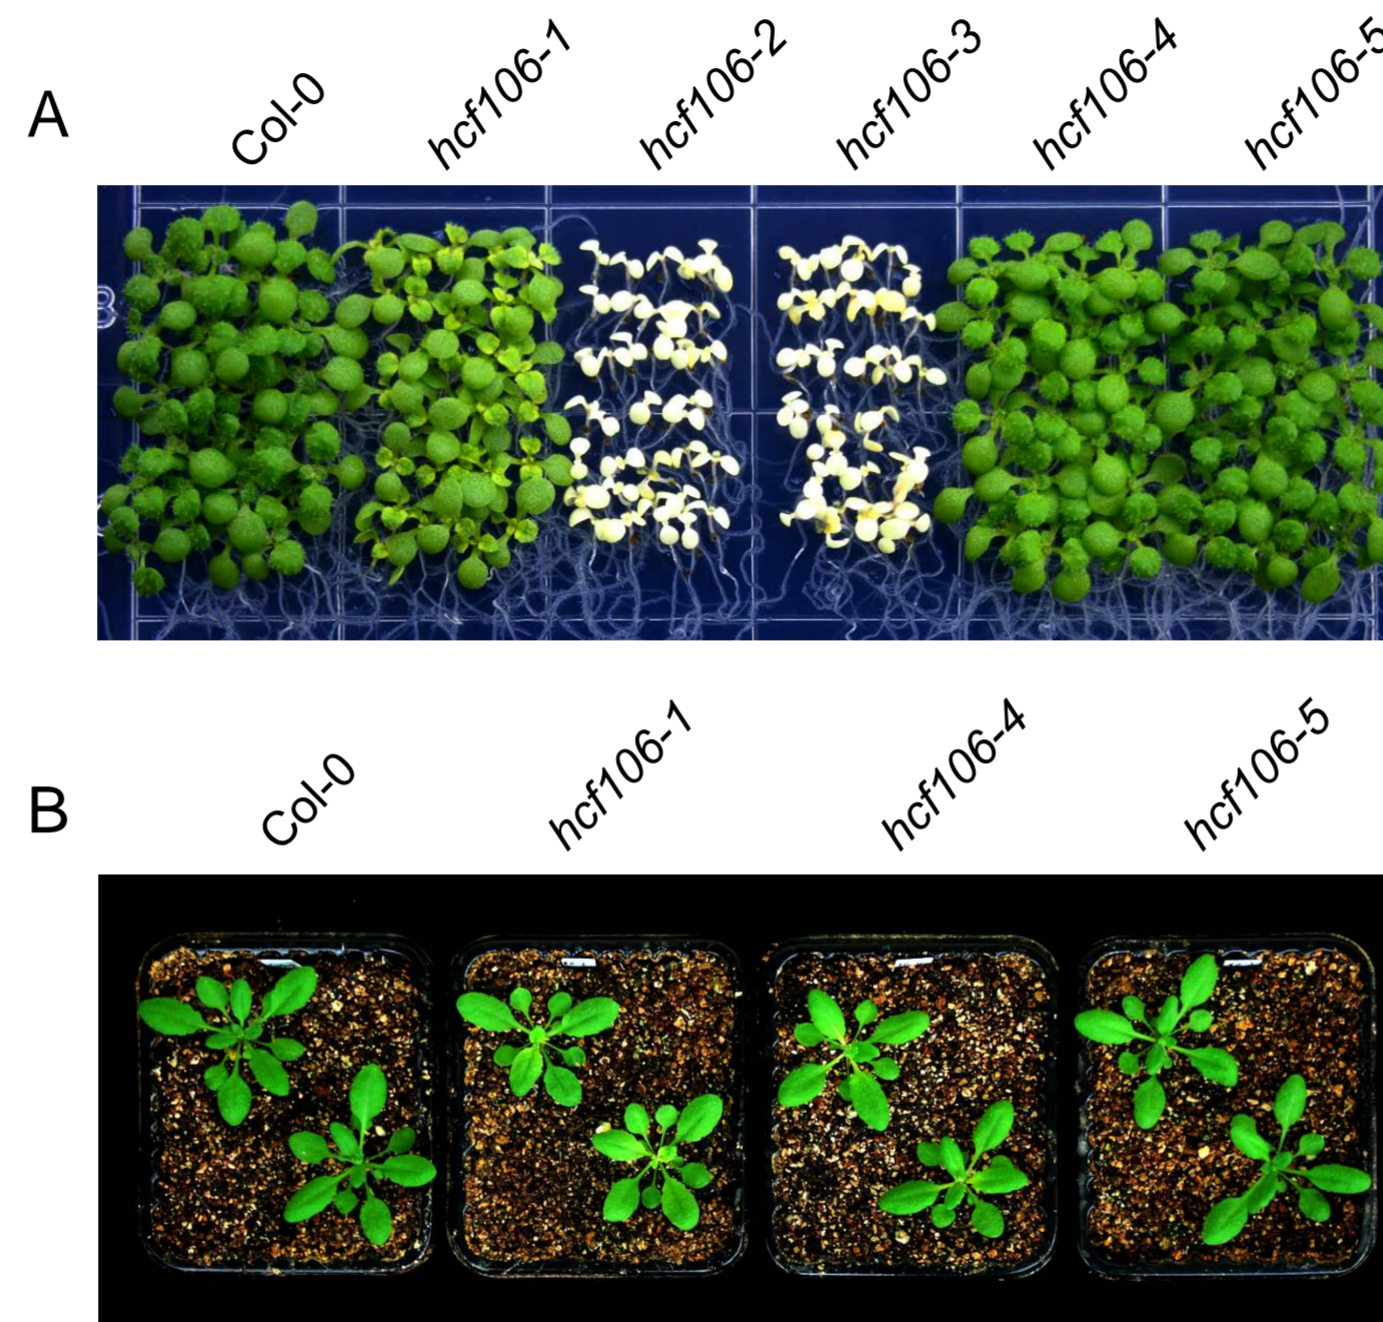

**Supplemental Figure 2. Developmental phenotype of the *hcf106* mutants**

(A) Phenotypes of 10-day-old Col-0, *hcf106-1*, *hcf106-2*, *hcf106-3*, *hcf106-4*, and *hcf106-5* seedlings under normal growth conditions. (B) Phenotypes of 21-day-old Col-0, *hcf106-1*, *hcf106-4*, and *hcf106-5* plants grown in soil under normal growth conditions.

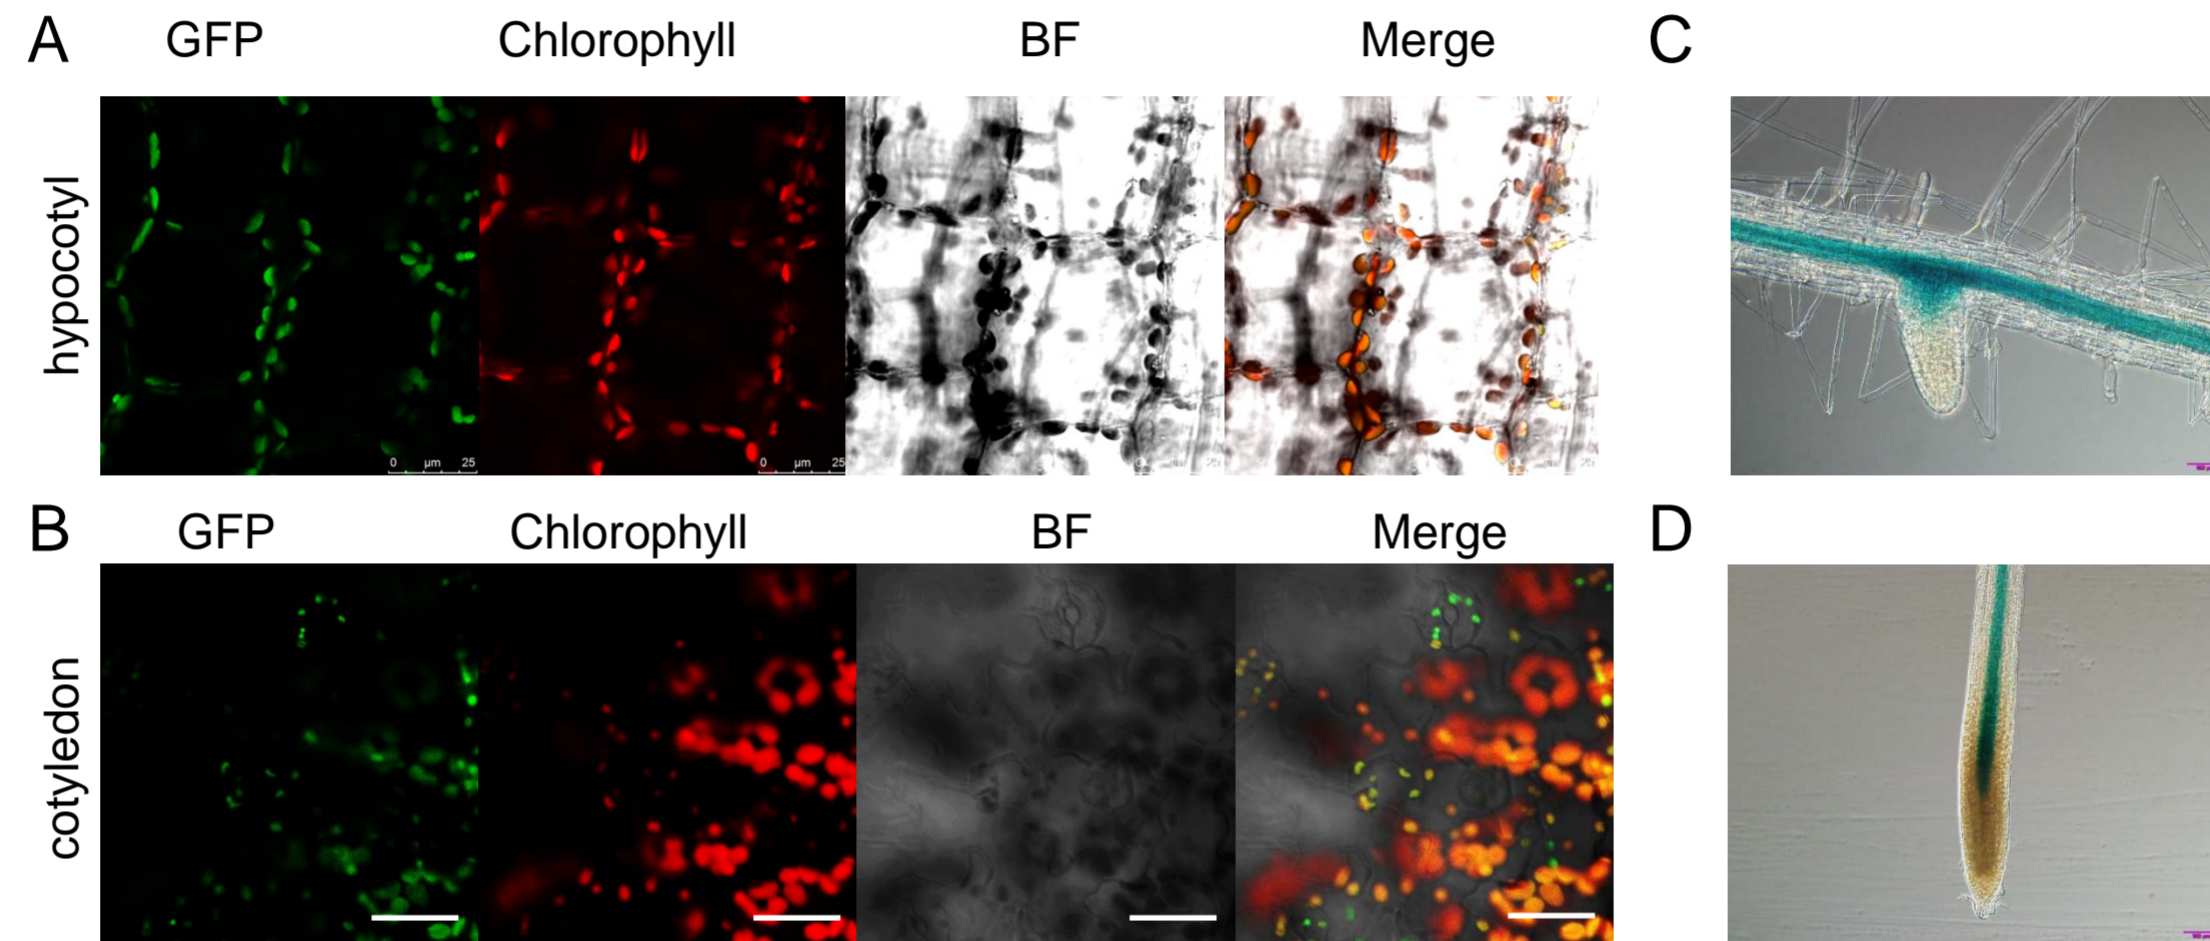

**Supplemental Figure 3. Subcellular localization of HCF106-GFP and root expression pattern of *HCF106***  
 (A) and (B) Subcellular localization of HCF106-GFP. Transgenic Arabidopsis seedlings expressing genomic *HCF106-GFP* driven by its native promoter. GFP, green fluorescence protein. Chlorophyll, auto-fluorescence of chlorophyll. BF, bright field. Scale bars, 20 μm. (C) and (D) GUS activity in the roots of 10-day-old seedlings containing *HCF106pro-GUS*. Scale bars, 100 μm.

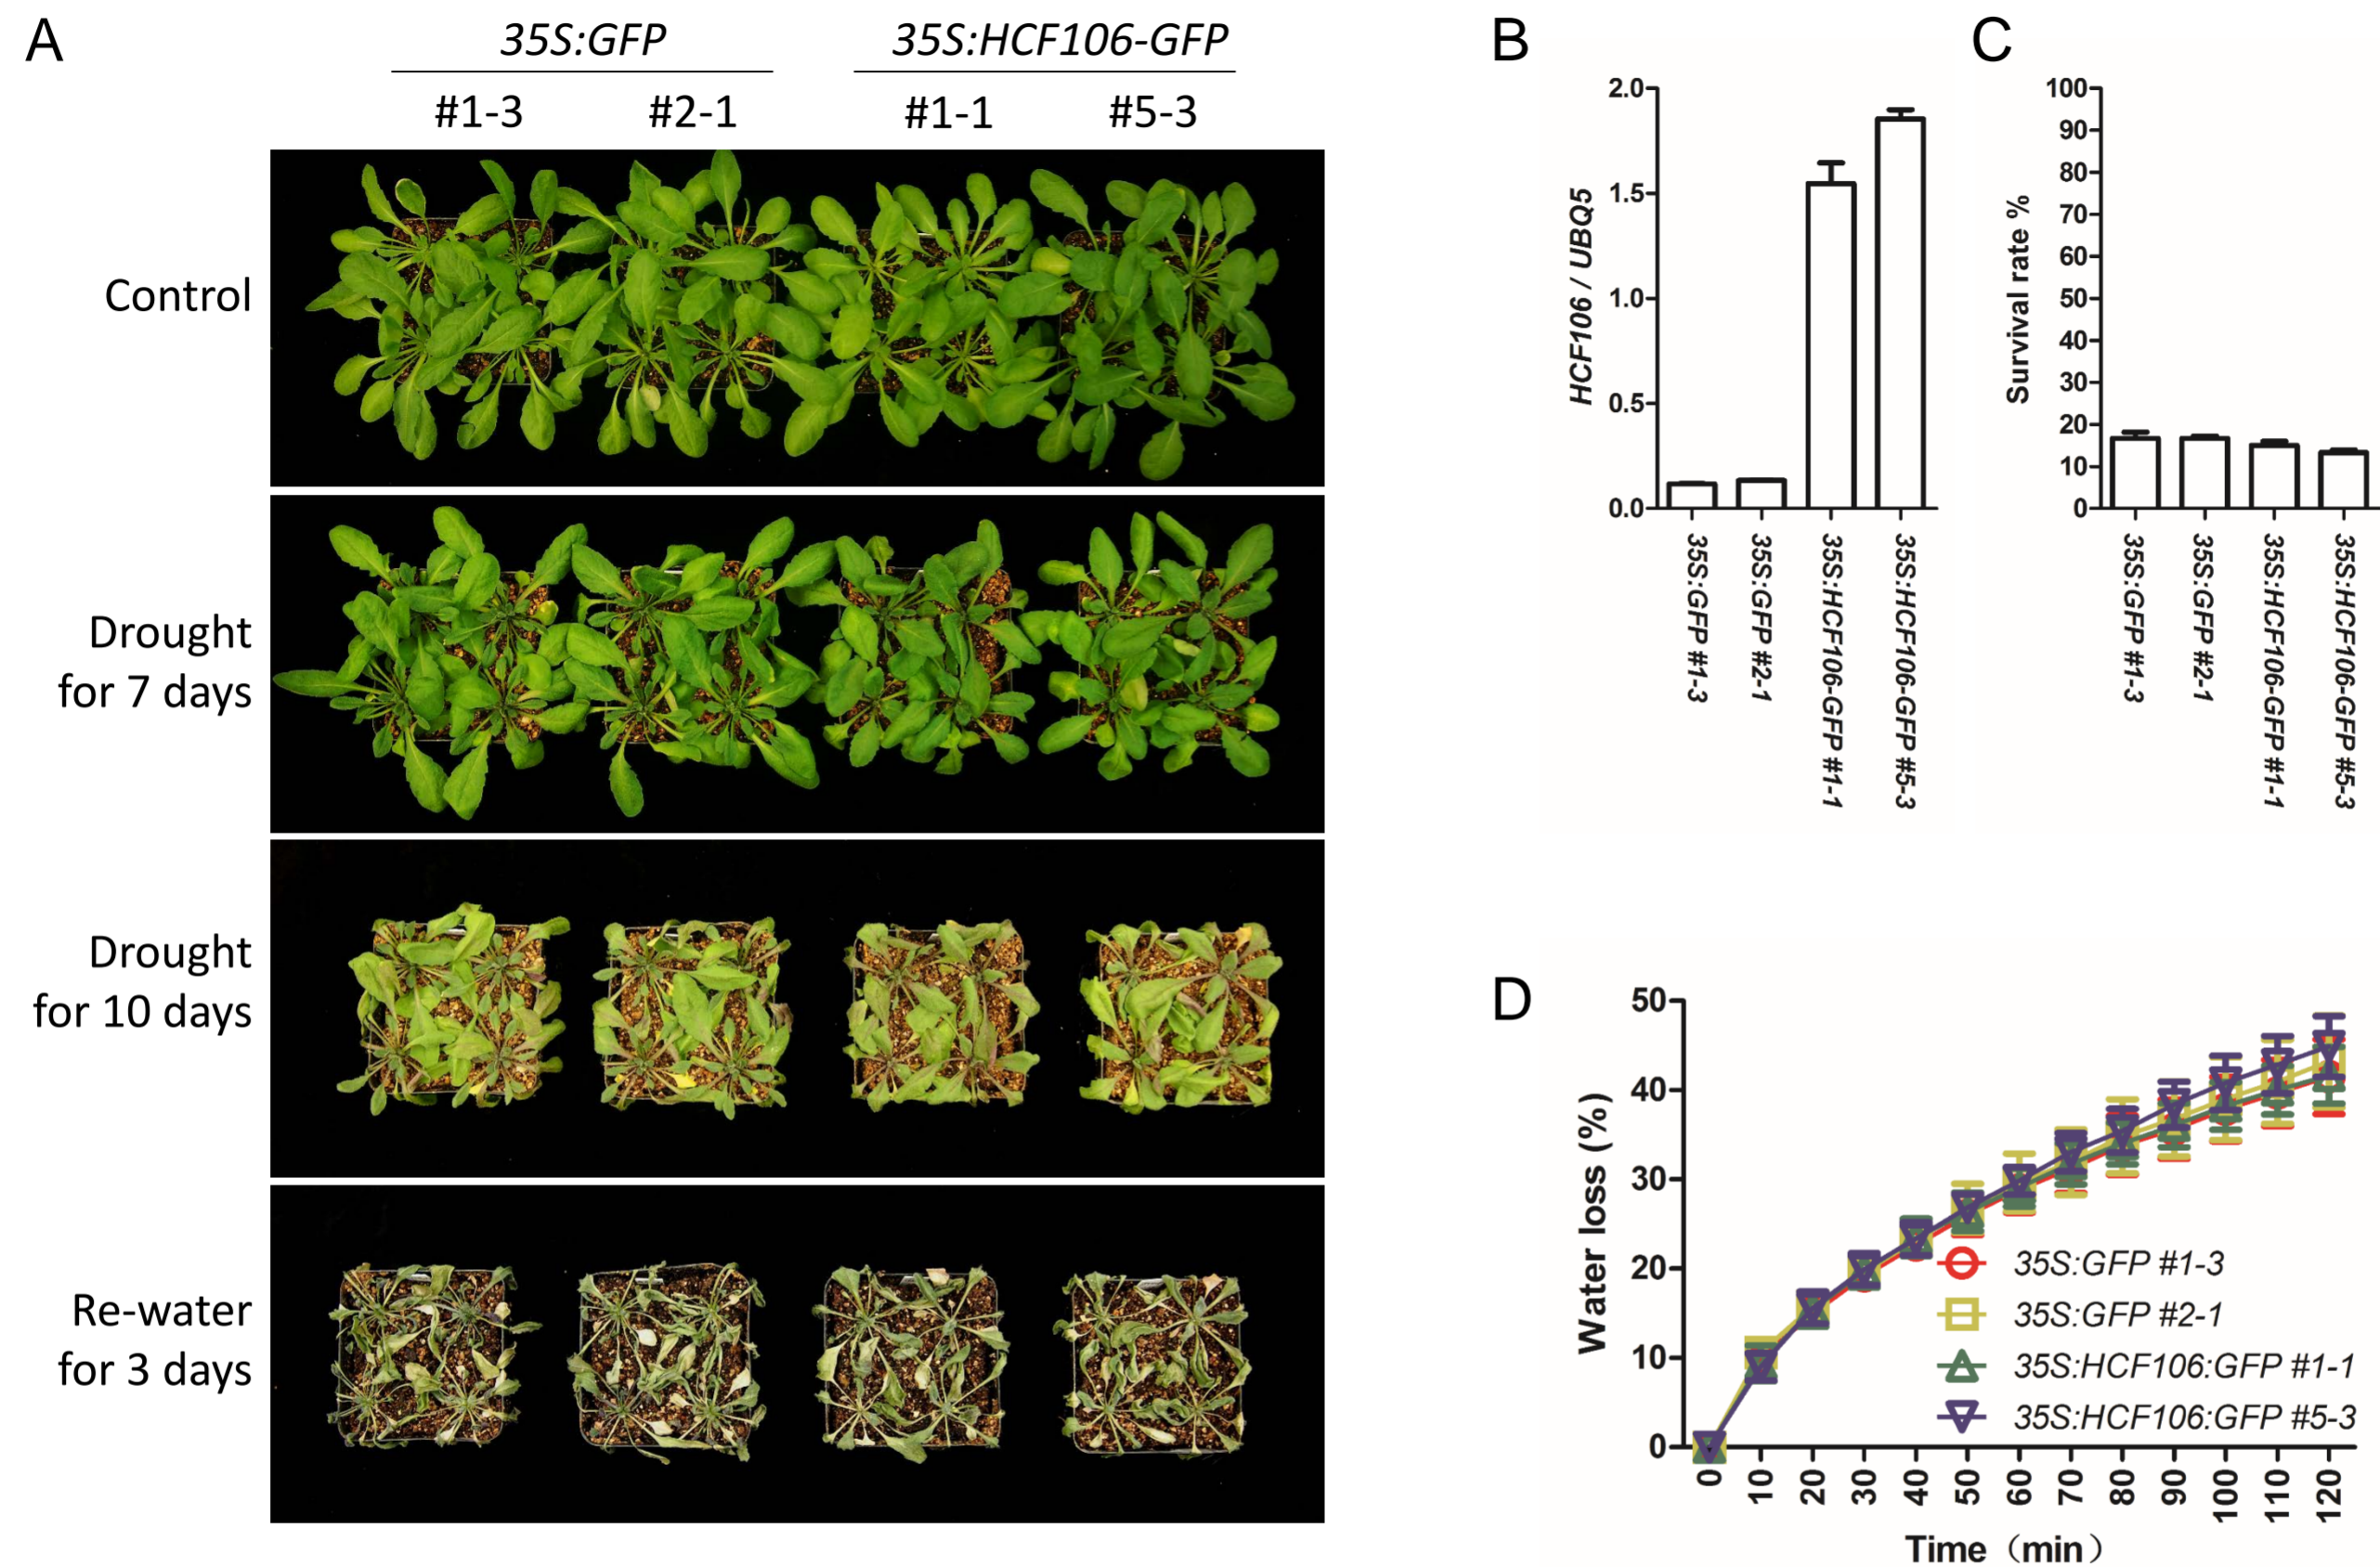

#### Supplemental Figure 4. Drought assay of the over-expression lines of *HCF106*

(A) Transgenic lines of *35S:GFP* and *35S:HCF106:GFP* grown under normal growth conditions for 21 days were treated with drought for 7 days or 10 days and recovered for 3 days. Control, well-watered plants. (B) *HCF106* transcript levels in the *35S:GFP* and *35S:HCF106:GFP* transgenic lines. Values are means  $\pm$  SD (n = 3). (C) Survival rate of the *HCF106* overexpression plants after drought and re-watering (for 3 days) treatment (n = 4 biological replicates, 20 plants of each replicate). Data represent means  $\pm$  SD (n = 3). (D) Water loss in the transgenic plant leaves (n=4, each containing 3 fully expanded leaves from 30-day-old plants). Data represent means  $\pm$  SD (n = 3). #1-3 and #2-1, two independent transgenic lines of *35S:GFP*; #1-1 and #5-3, two independent transgenic lines of *35S:HCF106:GFP*.

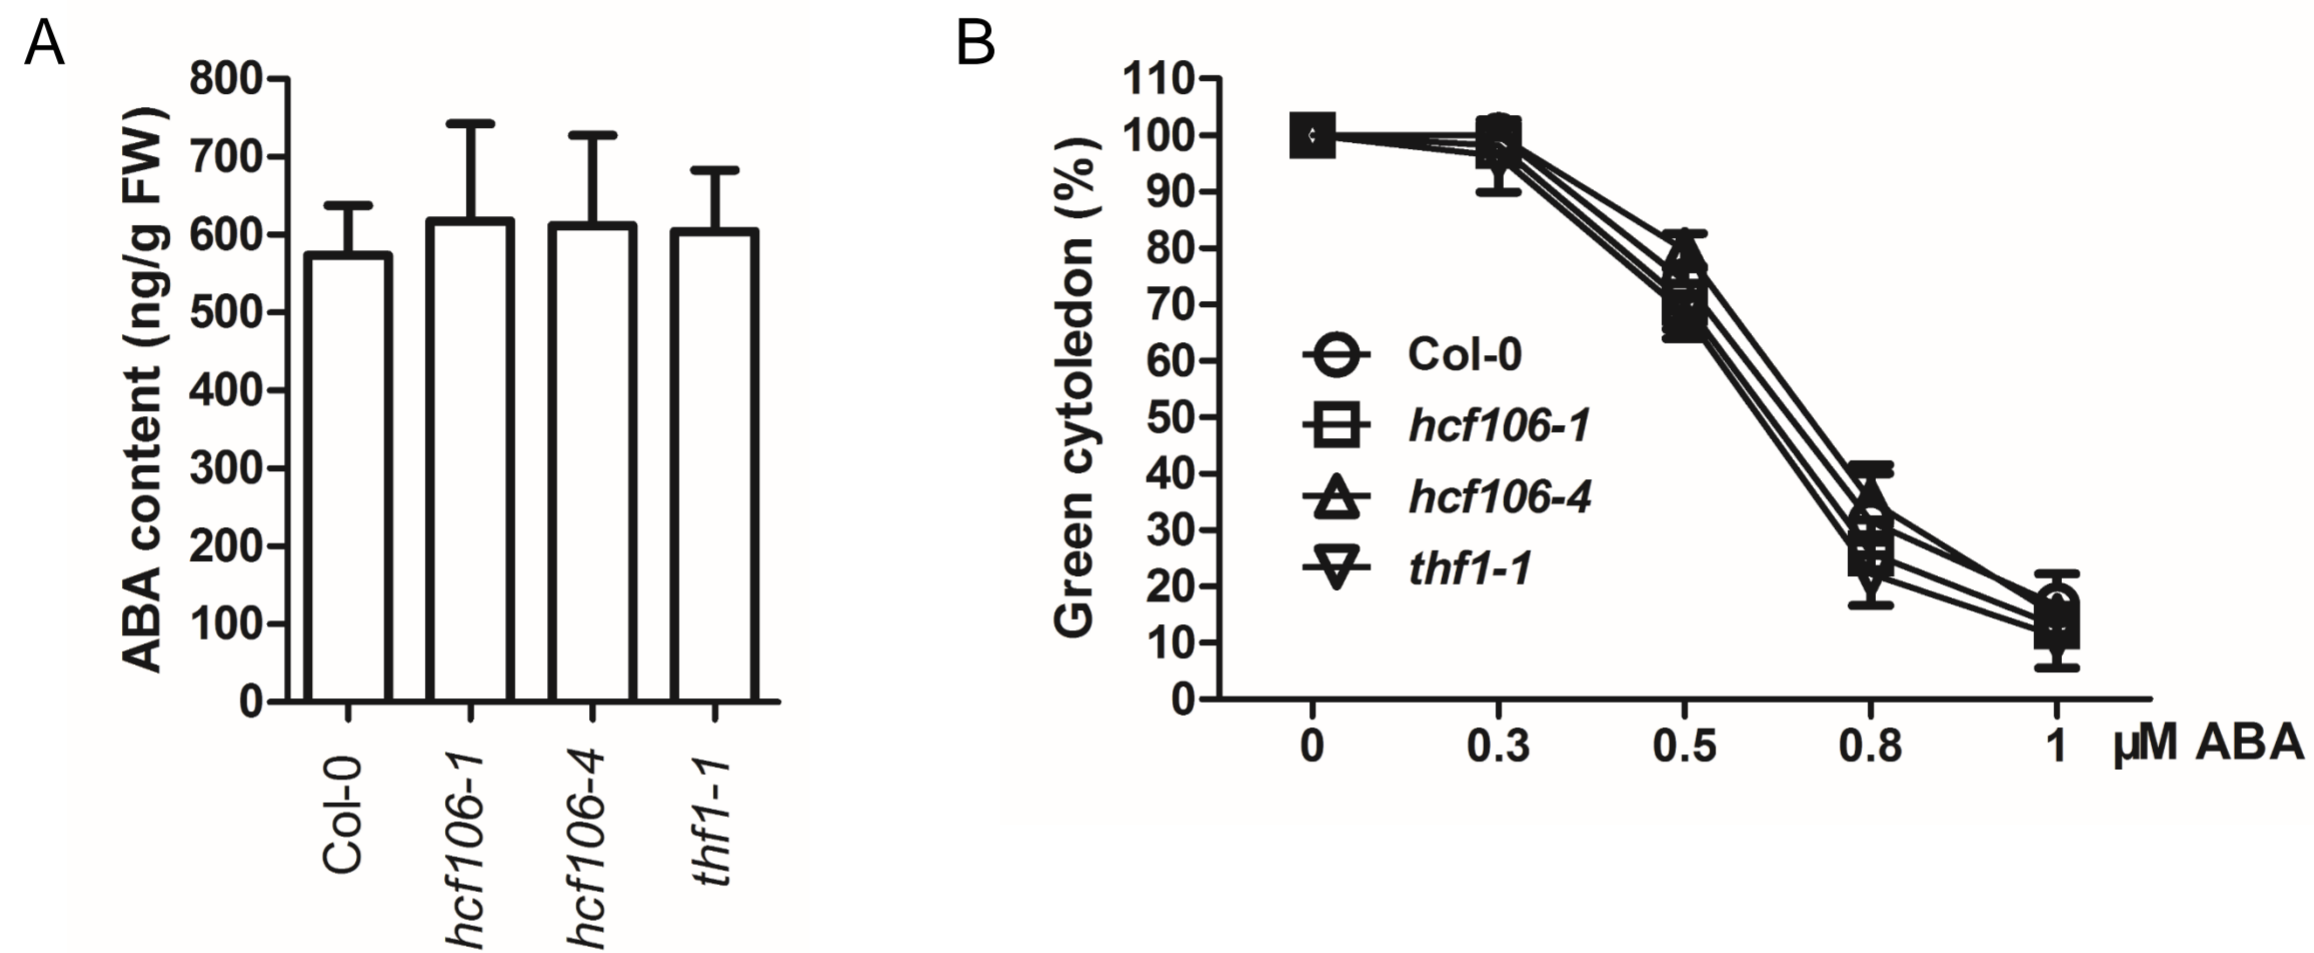

**Supplemental Figure 5. ABA contents and germination assay of *hcf106* and *thf1* mutants**

(A) ABA contents in the leaves of 4-week-old Col-0, *hcf106-1*, *hcf106-4*, and *thf1-1* plants after drought stress for 7 days. (B) Seed germination rate of Col-0, *hcf106-1*, *hcf106-4*, and *thf1-1* at the seventh day in 1/2 MS with different concentrations of exogenous ABA. Values are means  $\pm$  SD (n = 3).

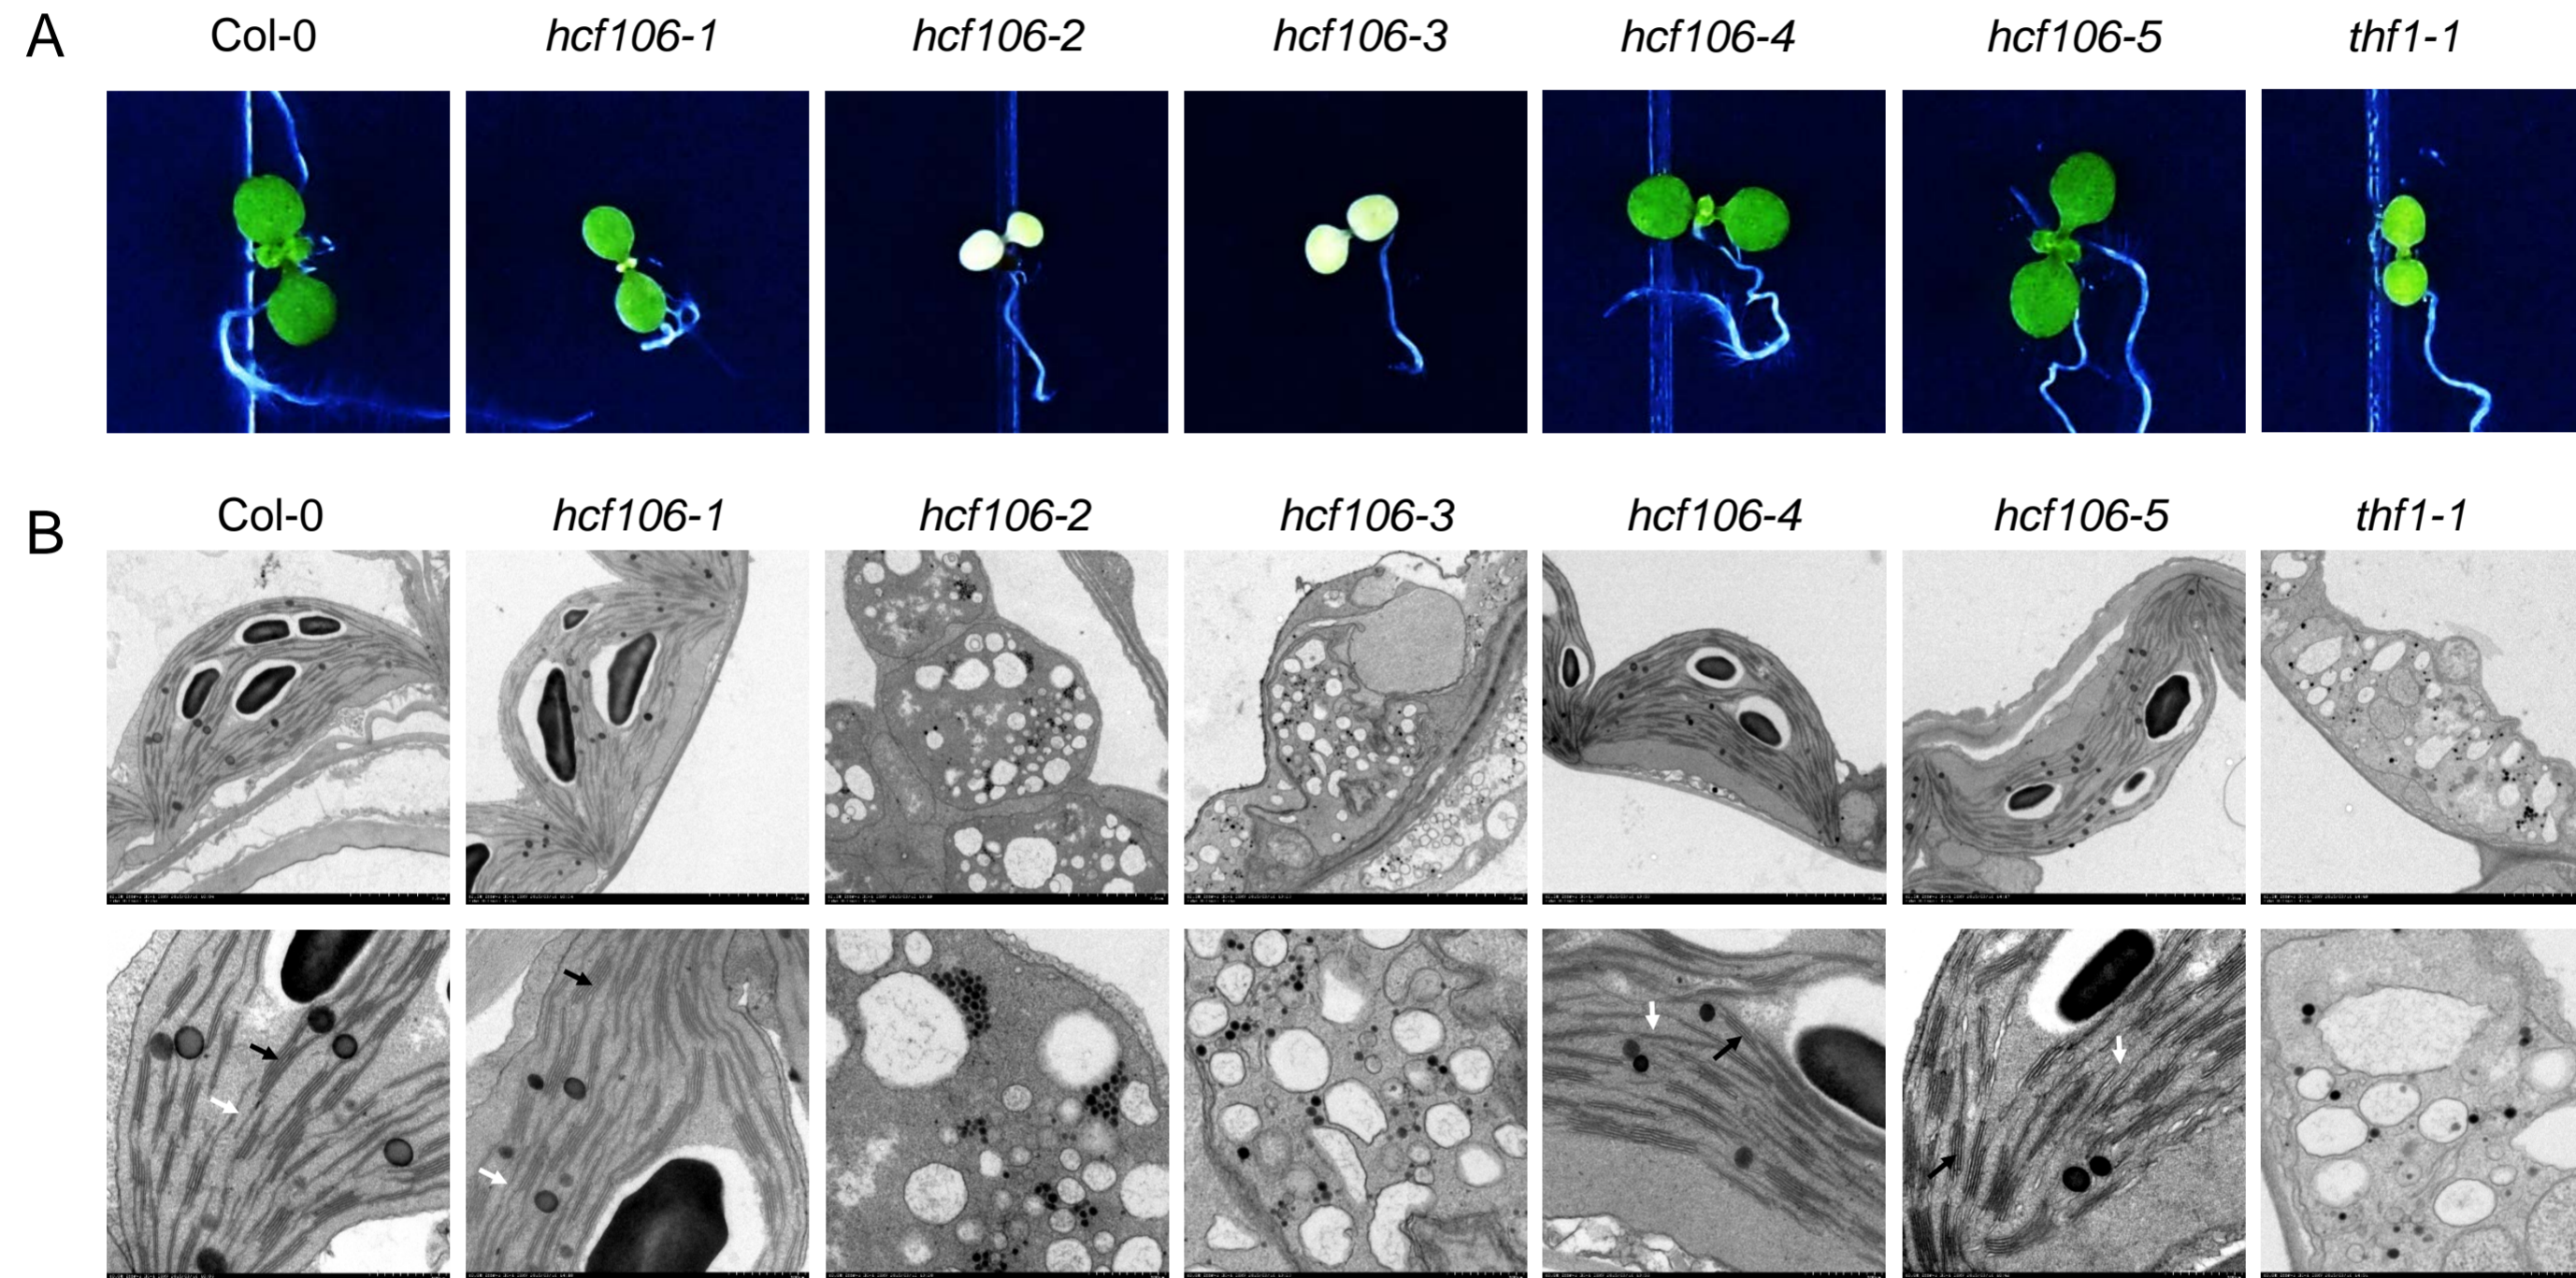

**Supplemental Figure 6. Ultrastructure of chloroplasts in the *hcf106* and *thf1* mutants**

(A) Phenotypes of 6-day-old Col-0, *hcf106-1*, *hcf106-2*, *hcf106-3*, *hcf106-4*, *hcf106-5* and *thf1-1* seedlings under normal growth conditions. (B) Ultrastructure of chloroplasts from cotyledons of 6-day-old Col-0, *hcf106-1*, *hcf106-2*, *hcf106-3*, *hcf106-4*, *hcf106-5* and *thf1-1*. A representative chloroplast is shown on the upper panel, and the magnified structure is shown on the lower panel. Black arrows, grana thylakoid; White arrow, stromal thylakoid.

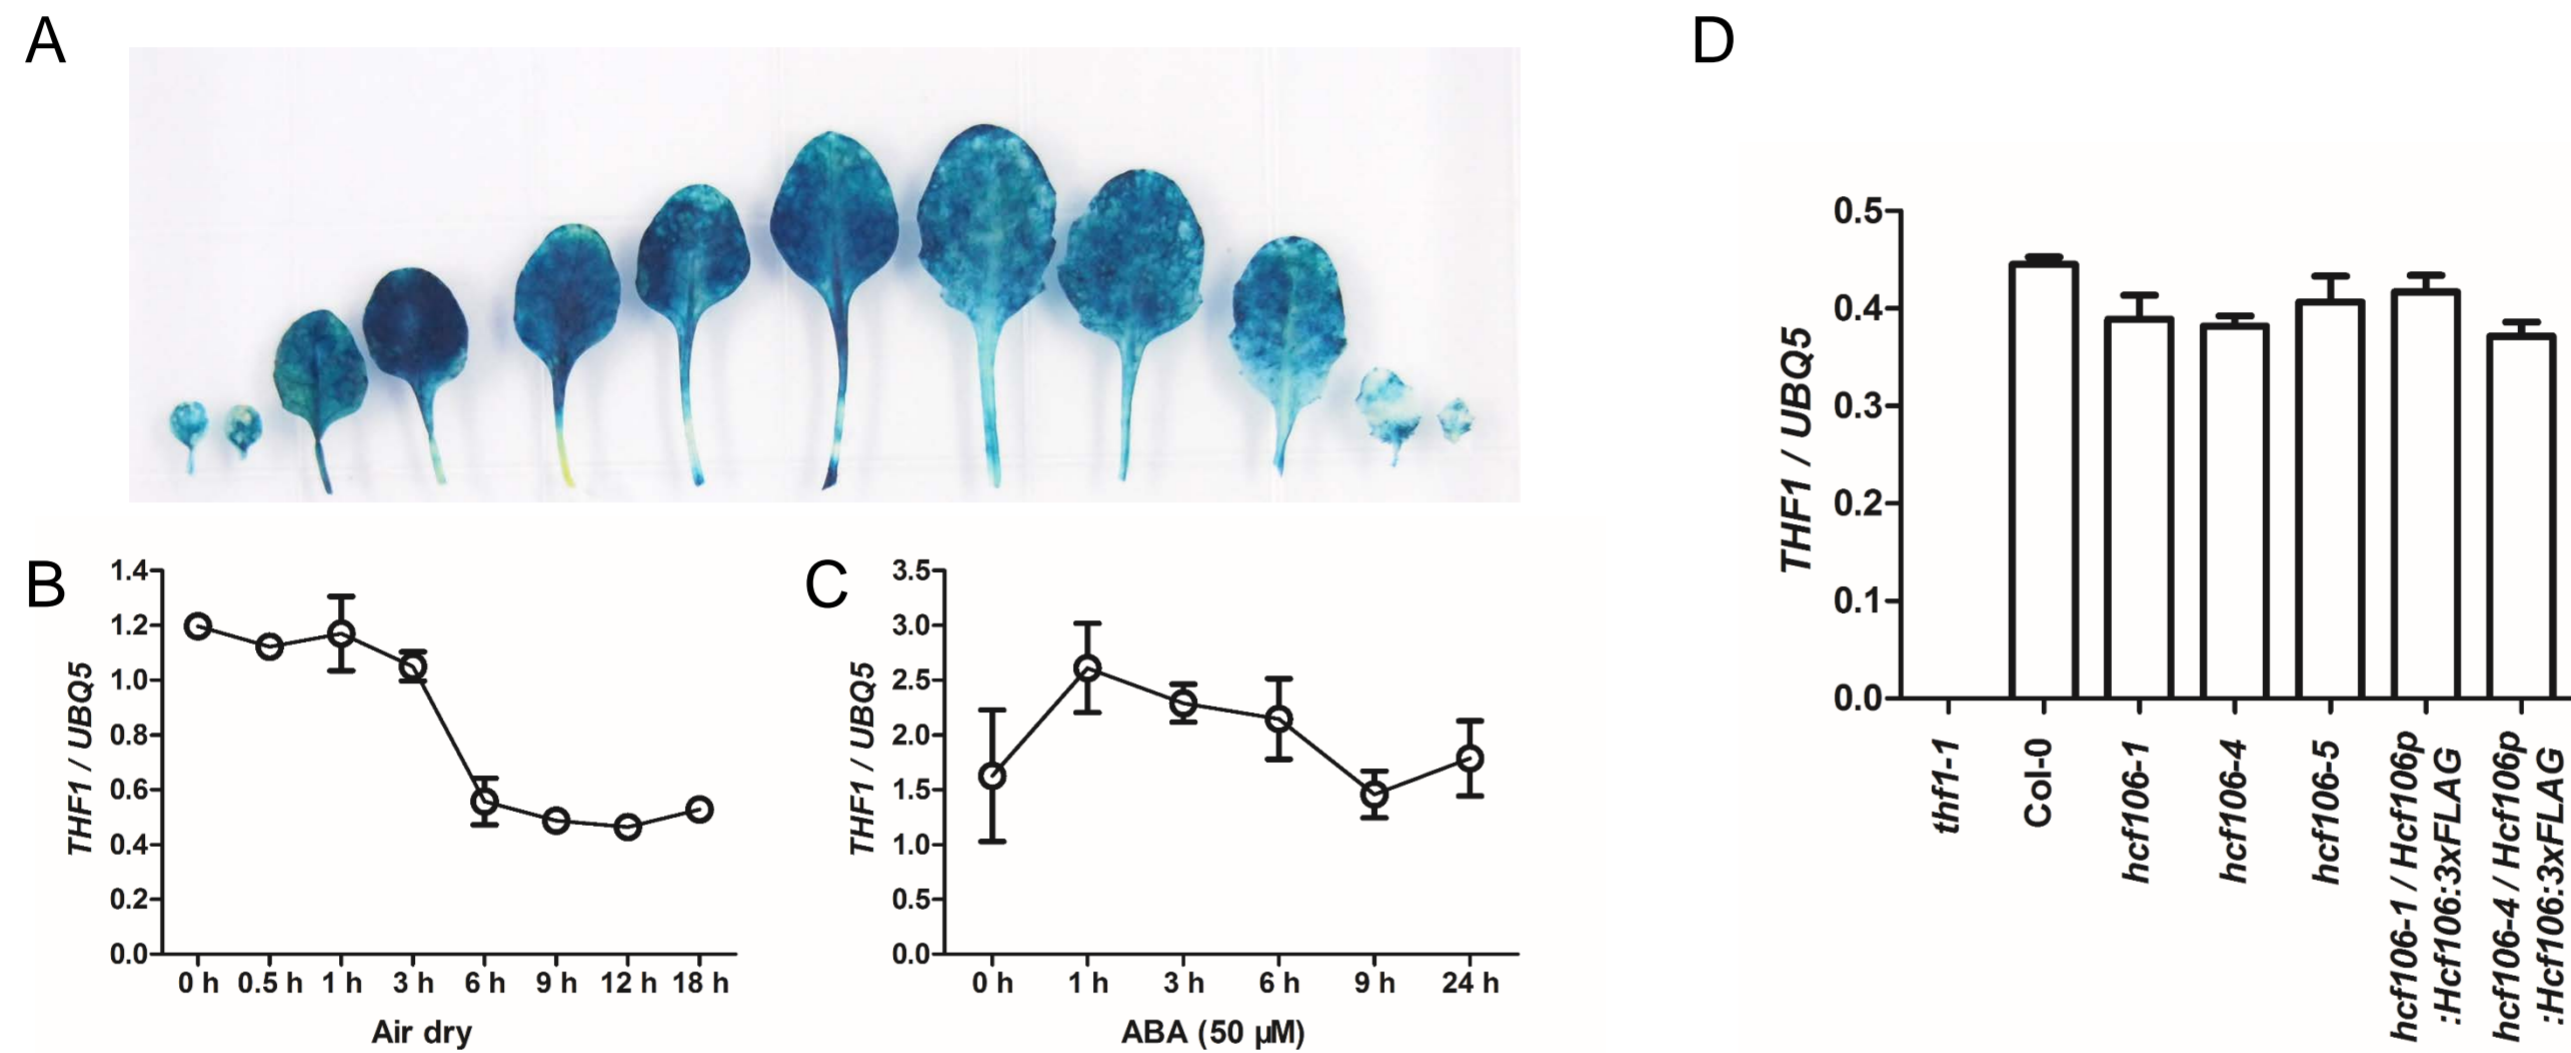

### Supplemental Figure 7. Expression pattern of *THF1*

(A) GUS activity in rosette leaves of 21-day-old Arabidopsis containing the fusion *THF1pro-GUS*. (B) and (C) *HCF106* expression levels in 21-day-old plant leaves treated with air drying (B), or 50  $\mu$ M ABA (C). (D) Relative expression levels of *THF1* in leaves of *thf1-1*, Col-0, *hcf106-1*, *hcf106-4*, *hcf106-5*, *hcf106-1* complementation line, and *hcf106-4* complementation line. Values are means  $\pm$  SD (n = 3).

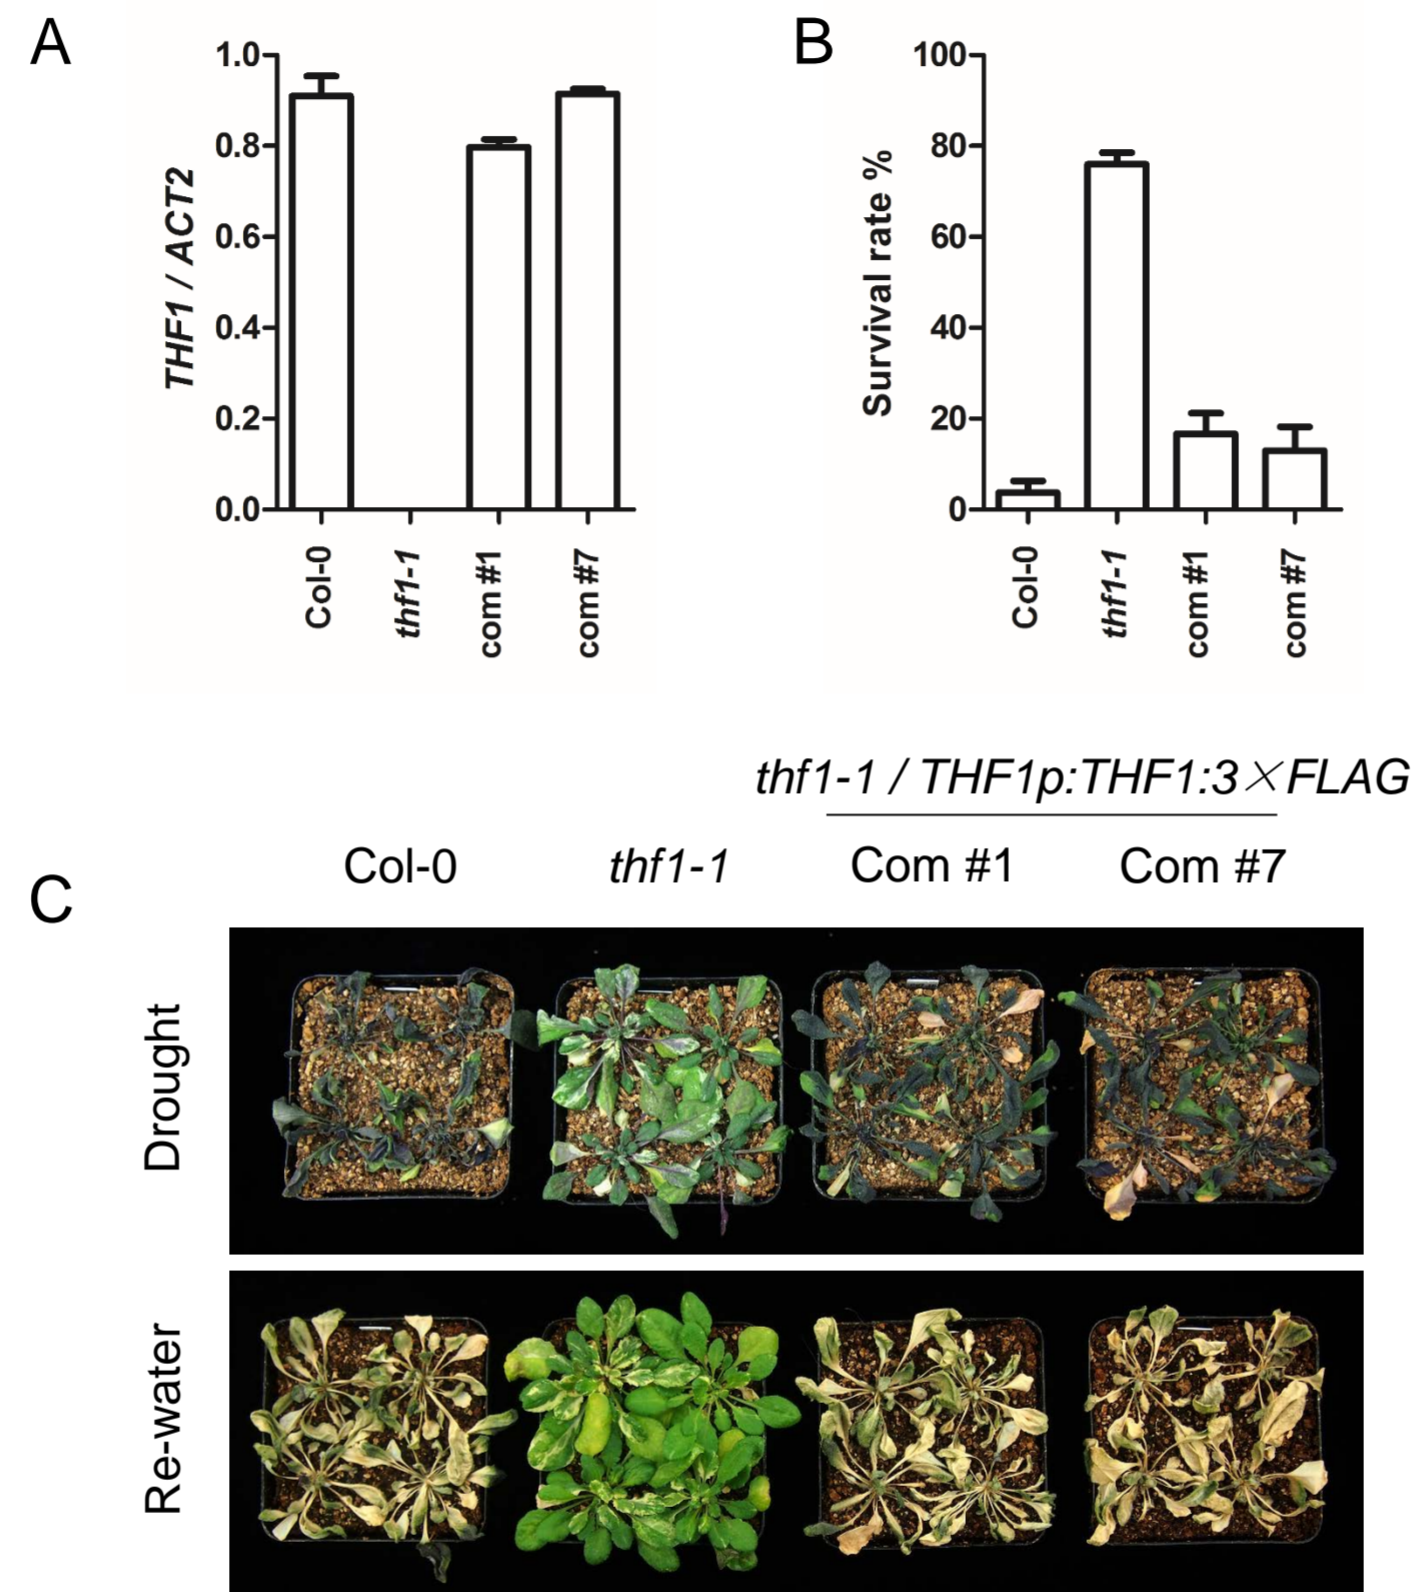

**Supplemental Figure 8. Drought assay of *thf1-1* complementation lines**

(A) *THF1* expression levels in Col-0, *thf1-1*, and the complementation lines. Values are means  $\pm$  SD (n=3)  
 (B) Survival rate of the complementation plants after drought and re-watering (for 5 days) treatment (n = 4 biological replicates, 16 plants of each replicate). Data represent means  $\pm$  SD (n = 3). (C) Col-0, *thf1-1*, Com #1 and Com #7 of the complementation lines grown under normal growth conditions for 21 days and then drought for 12 days, and recovered for 5 days.



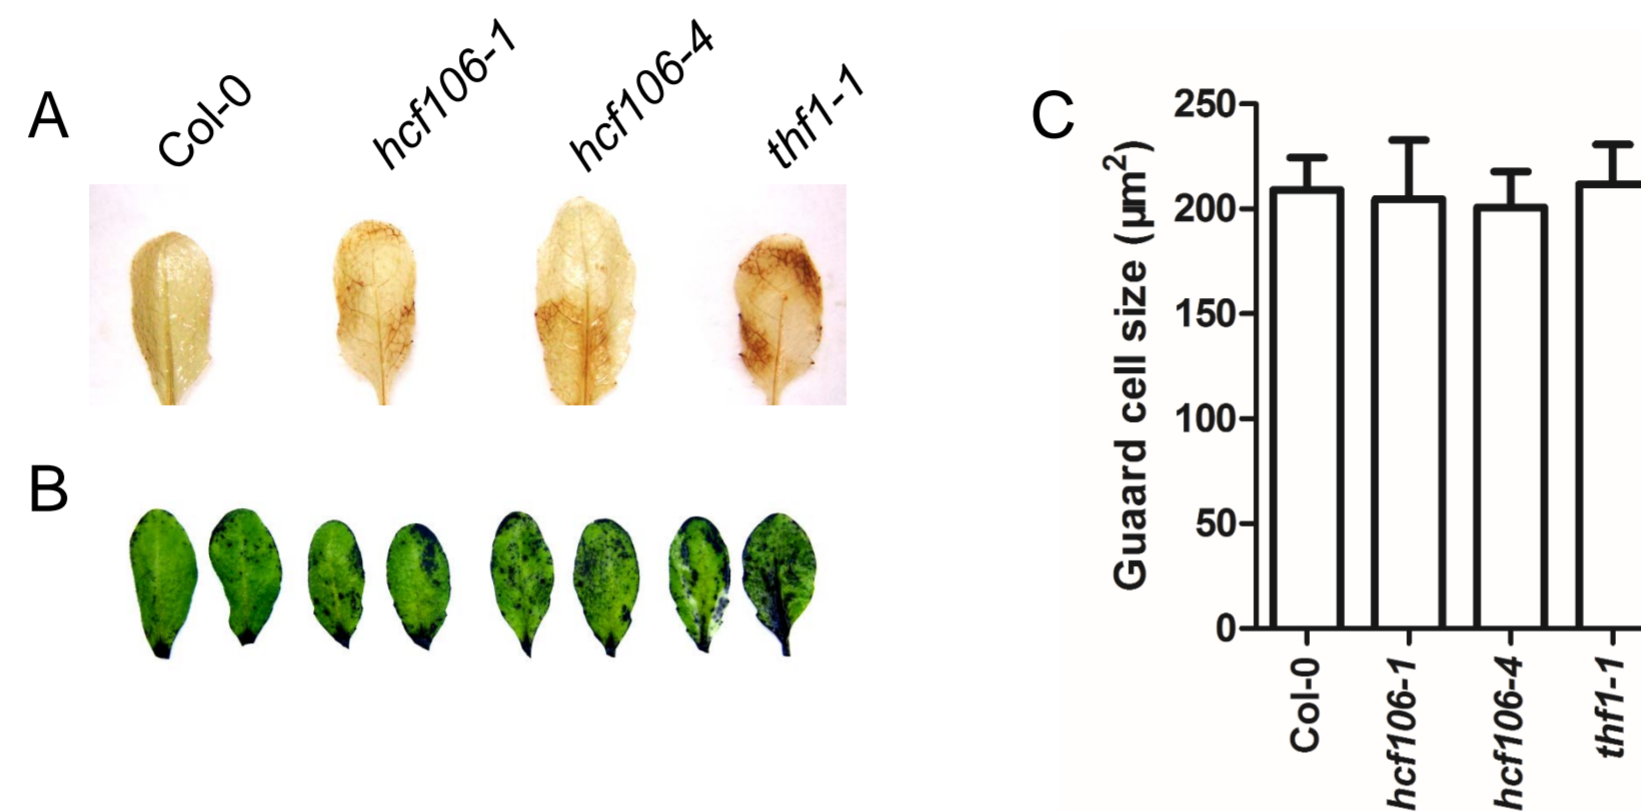

**Supplemental Figure 9. Determination of ROS and guard cell size in *hcf106* and *thf1* mutants**

(A) DAB staining and (B) NBT staining of the mature leaves of Col-0, *hcf106-1*, *hcf106-4*, and *thf1-1* from 21-day-old plants following drought stress for 7 days. (C) Measurement of guard cell size of Col-0, *hcf106-1*, *hcf106-4*, and *thf1-1* (n = 5 leaves, 5 stomata per leaf of 28-day-old plants). Data represent means  $\pm$  SD.

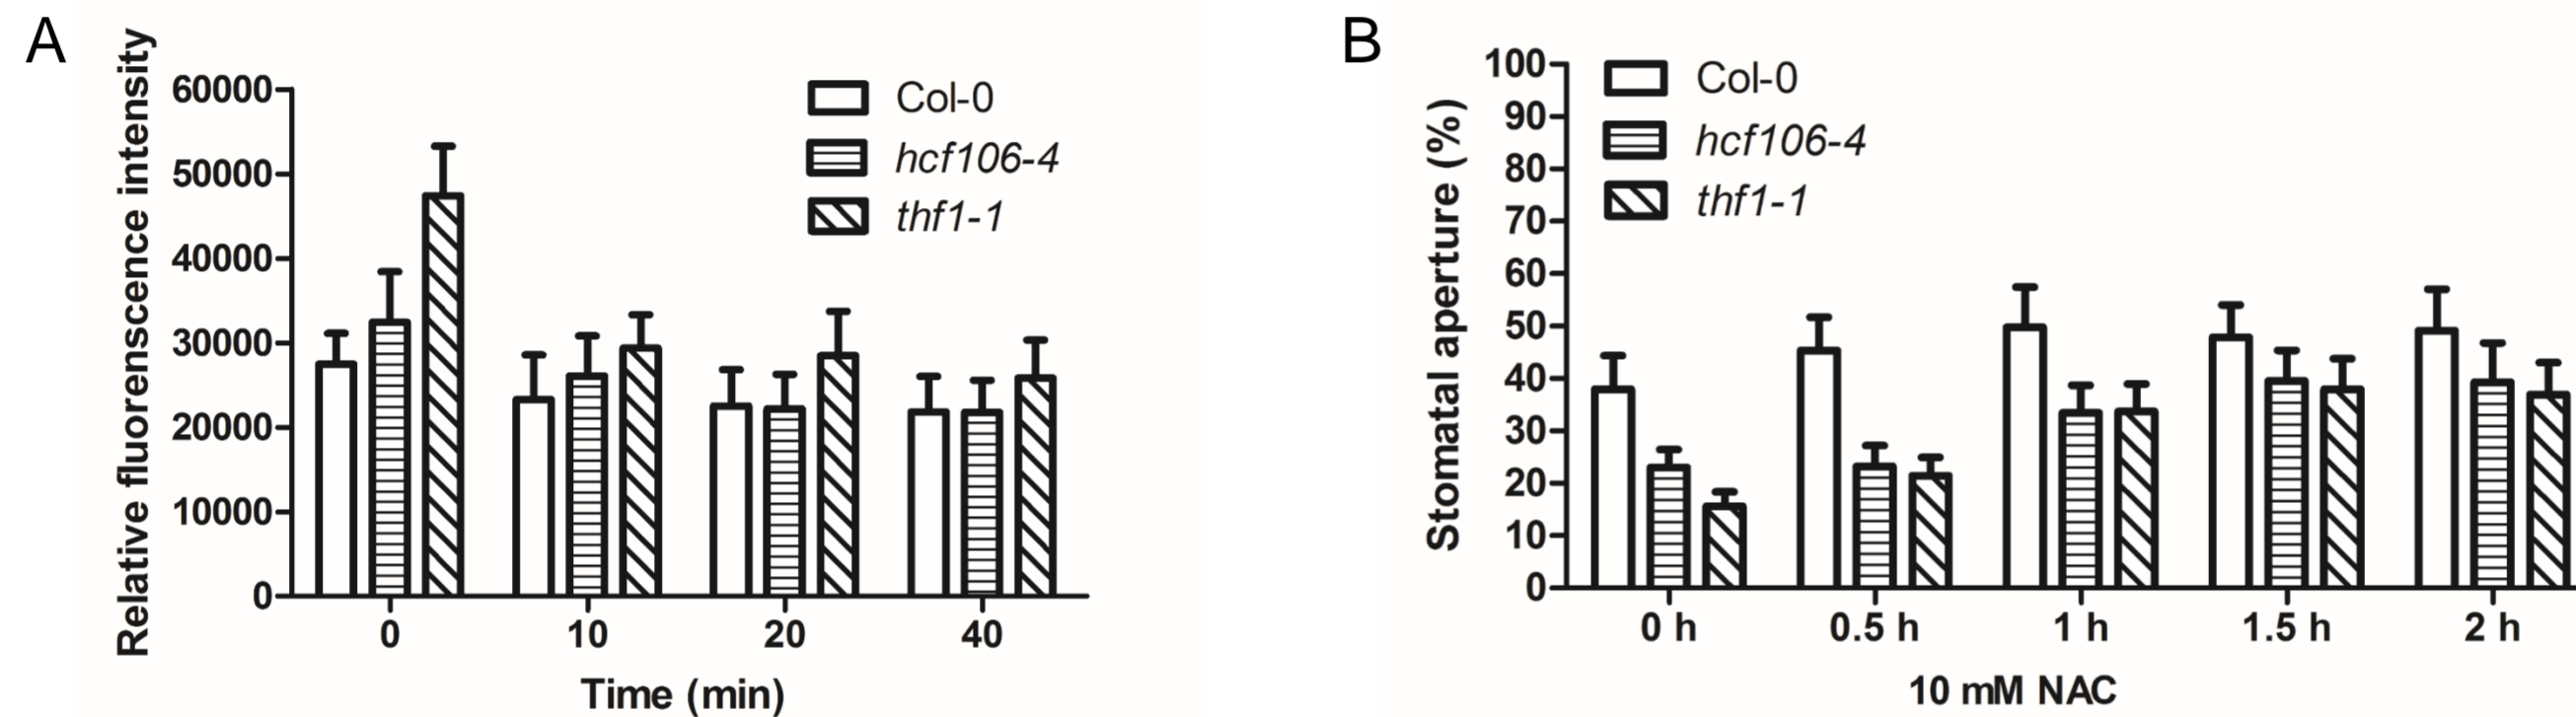

**Supplemental Figure 10. ROS affects the stomatal aperture in *hcf106* and *thf1* mutants**

(A) H<sub>2</sub>O<sub>2</sub> level in guard cells obtained from CM-H2DCFDA fluorescence imaging in 21-day-old Col-0, *hcf106-4*, *thf1-1* after drought for 7 days. Values are displayed as the mean pixel intensities after treatment with 1 mM NAC for 0, 10, 20, and 40 min (n > 30; mean ± SD). (B) Responses of the stomatal aperture to 10 mM NAC at the indicated time in leaves of 21-day-old Col-0, *hcf106-4*, and *thf1-1* after drought for 7 days. Values are means ± SD (n ≥ 50).

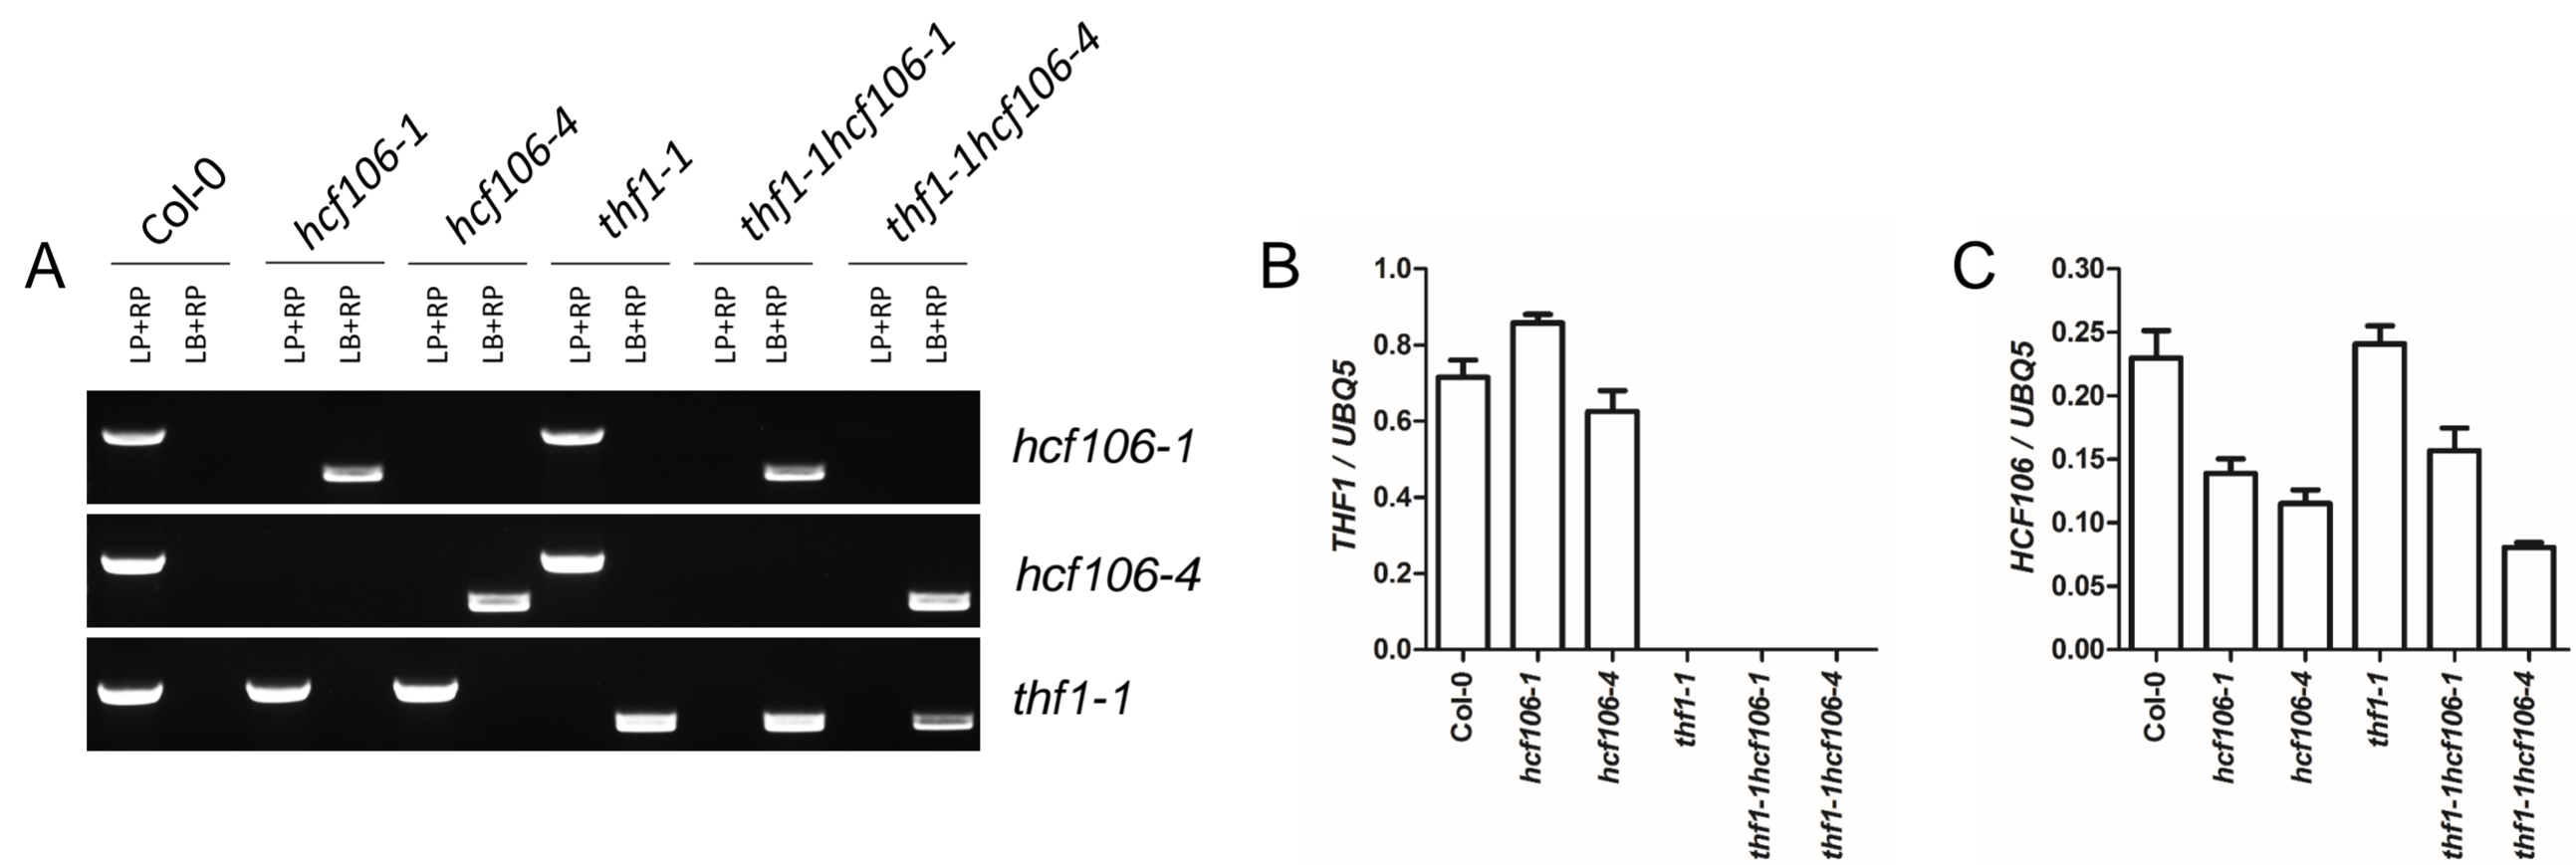

**Supplemental Figure 11. Identification of the double mutant *thf1hcf106*.**

(A) Genotyping of *thf1-1hcf106-1*, *thf1-1hcf106-4*. LP, left primer. RP, right primer. LB, primer of T-DNA left border. (B) and (C) Expression levels of *THF1* and *HCF106* in Col-0, *hcf106-1*, *hcf106-4*, *thf1-1*, *thf1-1hcf106-1*, and *thf1-1hcf106-4*. Values are means  $\pm$  SD (n=3).

**Supplemental Table S1. Proteins interacting with HCF106 as identified by mass spectrometry in chloroplast**

| Protein Name           | Accession Number | Description                                                  | Number of peptides identified |
|------------------------|------------------|--------------------------------------------------------------|-------------------------------|
| HCF106                 | AT5G52440        | Bacterial sec-independent translocation protein mttA/Hcf106  | 55                            |
| THF1, PSB29            | AT2G20890        | photosystem II reaction center PSB29 protein                 | 6                             |
| SOQ1                   | AT1G56500        | haloacid dehalogenase-like hydrolase family protein          | 39                            |
| PSAD-2                 | AT1G03130        | photosystem I subunit D-2                                    | 32                            |
| PSAD-1                 | AT4G02770        | photosystem I subunit D-1                                    | 32                            |
| LOX2, ATLOX2           | AT3G45140        | lipoxygenase 2                                               | 27                            |
| PSBQ, PSBQA, PSBQ-1    | AT4G21280        | photosystem II subunit QA                                    | 26                            |
| AOS, CYP74A, DDE2      | AT5G42650        | allene oxide synthase                                        | 19                            |
| ATPF                   | ATCG00130        | ATPase, F0 complex, subunit B/B~, bacterial/chloroplast      | 15                            |
| VAR1, FTSH5            | AT5G42270        | FtsH extracellular protease family                           | 15                            |
| LHCB4.2                | AT3G08940        | light harvesting complex photosystem II                      | 14                            |
|                        | AT5G08670        | ATP synthase alpha/beta family protein                       | 12                            |
| FTSH1                  | AT1G50250        | FTSH protease 1                                              | 12                            |
| LHB1B2, LHCB1.5        | AT2G34420        | photosystem II light harvesting complex gene B1B2            | 12                            |
| LHCA3                  | AT1G61520        | photosystem I light harvesting complex gene 3                | 11                            |
| MFP1                   | AT3G16000        | MAR binding filament-like protein 1                          | 11                            |
| TAPX                   | AT1G77490        | thylakoidal ascorbate peroxidase                             | 11                            |
| GOX1                   | AT3G14420        | GLYCOLATE OXIDASE 1, Aldolase-type TIM barrel family protein | 11                            |
| APG2, UNE3, PGA2, TATC | AT2G01110        | Sec-independent periplasmic protein translocase              | 10                            |
| ATPC1                  | AT4G04640        | ATPase, F1 complex, gamma subunit protein                    | 10                            |
| AAC1                   | AT3G08580        | ADP/ATP carrier 1                                            | 10                            |

|                      |           |                                                                          |    |
|----------------------|-----------|--------------------------------------------------------------------------|----|
| TLP18.3              | AT1G54780 | thylakoid lumen 18.3 kDa protein                                         | 10 |
| PDE334               | AT4G32260 | ATPase, F0 complex, subunit B/B~, bacterial/chloroplast                  | 9  |
| ATTIC62, TIC62       | AT3G18890 | NAD(P)-binding Rossmann-fold superfamily protein                         | 9  |
| PSBP-1, PSII-P, OE23 | AT1G06680 | photosystem II subunit P-1                                               | 9  |
| GOX2                 | AT3G14415 | GLYCOLATE OXIDASE 2, Aldolase-type TIM barrel family protein             | 8  |
| ATPD                 | AT4G09650 | ATP synthase delta-subunit gene                                          | 8  |
| FIB4                 | AT3G23400 | Plastid-lipid associated protein PAP / fibrillin family protein          | 8  |
|                      | AT1G26090 | P-loop containing nucleoside triphosphate hydrolases superfamily protein | 8  |
| TROL                 | AT4G01050 | thylakoid rhodanese-like                                                 | 8  |
| PSAG                 | AT1G55670 | photosystem I subunit G                                                  | 8  |
|                      | AT1G18170 | FKBP-like peptidyl-prolyl cis-trans isomerase family protein             | 7  |
|                      | AT1G74470 | Pyridine nucleotide-disulphide oxidoreductase family protein             | 6  |
|                      | AT1G51110 | Plastid-lipid associated protein PAP / fibrillin family protein          | 6  |
| MPPBETA              | AT3G02090 | Insulinase (Peptidase family M16) protein                                | 6  |
| RCA                  | AT2G39730 | rubisco activase                                                         | 6  |
|                      | AT3G61870 | unknown protein                                                          | 5  |
|                      | AT5G03880 | Thioredoxin family protein                                               | 5  |
|                      | AT2G21960 | unknown protein                                                          | 5  |
| PETB                 | ATCG00720 | photosynthetic electron transfer B                                       | 5  |
| CCB1                 | AT3G26710 | cofactor assembly of complex C                                           | 5  |
| PSBH                 | ATCG00710 | photosystem II reaction center protein H                                 | 5  |
| ATPE                 | ATCG00470 | ATP synthase epsilon chain                                               | 5  |
| ATLFNR1, FNR1        | AT5G66190 | ferredoxin-NADP(+)-oxidoreductase 1                                      | 5  |
| LPA1                 | AT1G02910 | tetratricopeptide repeat (TPR)-containing protein                        | 5  |
| FTSH8                | AT1G06430 | FTSH protease 8                                                          | 4  |

|                      |           |                                                                                |   |
|----------------------|-----------|--------------------------------------------------------------------------------|---|
|                      | AT3G26080 | plastid-lipid associated protein PAP / fibrillin family protein                | 4 |
| AAC3, ATAAC3         | AT4G28390 | ADP/ATP carrier 3                                                              | 4 |
|                      | AT4G02530 | chloroplast thylakoid lumen protein                                            | 4 |
| PGR5-LIKE A          | AT4G22890 | PGR5-LIKE A                                                                    | 4 |
|                      | AT2G35490 | Plastid-lipid associated protein PAP / fibrillin family protein                | 4 |
| LHCA4, CAB4          | AT3G47470 | light-harvesting chlorophyll-protein complex I subunit A4                      | 4 |
| CRD1, CHL27, ACSF    | AT3G56940 | dicarboxylate diiron protein, putative (Crd1)                                  | 4 |
| NDF2, NDH45          | AT1G64770 | NDH-dependent cyclic electron flow 1                                           | 4 |
| ENH1                 | AT5G17170 | rubredoxin family protein                                                      | 4 |
| ATG4, G4, CHLG       | AT3G51820 | UbiA prenyltransferase family protein                                          | 4 |
| APX4, TL29           | AT4G09010 | ascorbate peroxidase 4                                                         | 4 |
|                      | AT2G34460 | NAD(P)-binding Rossmann-fold superfamily protein                               | 4 |
| PSAA                 | ATCG00350 | Photosystem I, PsaA/PsaB protein                                               | 4 |
| PTAC8, TMP14, PSAP   | AT2G46820 | photosystem I P subunit                                                        | 4 |
| PSAH2, PSAH-2, PSI-H | AT1G52230 | photosystem I subunit H2                                                       | 4 |
|                      | AT2G47710 | Adenine nucleotide alpha hydrolases-like superfamily protein                   | 4 |
| PSBG                 | ATCG00430 | photosystem II reaction center protein G                                       | 4 |
|                      | AT2G32640 | Lycopene beta/epsilon cyclase protein                                          | 4 |
| PSAC                 | ATCG01060 | iron-sulfur cluster binding;electron carriers;4 iron, 4 sulfur cluster binding | 4 |
| FLU                  | AT3G14110 | Tetratricopeptide repeat (TPR)-like superfamily protein                        | 4 |
| WLIM1                | AT1G10200 | GATA type zinc finger transcription factor family protein                      | 4 |
| FBA1                 | AT2G21330 | fructose-bisphosphate aldolase 1                                               | 4 |
| CRR31, NDHS          | AT4G23890 | CHLORORESPIRATORY REDUCTION 31, NADH dehydrogenase-like complex                | 4 |

**Supplemental Table S2. Primers used in this study**

| Name                       | Sequence (5'>3')                                       | Purpose                      |
|----------------------------|--------------------------------------------------------|------------------------------|
| SALK_067017C LP            | GACCTCCTCTCAAGTTTTGAG                                  | <i>hcf106-1</i> genotyping   |
| SALK_067017C RP            | AACCTGGGTTTGAAGATTTTCG                                 | <i>hcf106-1</i> genotyping   |
| SALK_044421C LP            | TCAAATGGCTCCGTATAGACG                                  | <i>hcf106-2</i> genotyping   |
| SALK_044421C RP            | ATCCCTATGATTTCGACGTTTG                                 | <i>hcf106-2</i> genotyping   |
| SALK_020680 LP             | GTCTCTGTTTGGTGTGGAGC                                   | <i>hcf106-3</i> genotyping   |
| SALK_020680 RP             | AGCGGGAGACAAAGCTTTTAG                                  | <i>hcf106-3</i> genotyping   |
| SAIL_760_H06 LP            | GCCAAAAGGTCATCTATCTCTAGC                               | <i>hcf106-4</i> genotyping   |
| SAIL_760_H06 RP            | CCATGTTGACATCAGTCAAAAC                                 | <i>hcf106-4</i> genotyping   |
| SAIL_831_E01 LP            | GACCTCCTCTCAAGTTTTGAGC                                 | <i>hcf106-5</i> genotyping   |
| SAIL_831_E01 RP            | AACCTGGGTTTGAAGATTTTCG                                 | <i>hcf106-5</i> genotyping   |
| SALK_094925 LP             | GGATCAGTAGCACTTGCAAGC                                  | <i>thf1-1</i> genotyping     |
| SALK_094925 RP             | TAACGTGGACAGACAAGGGAC                                  | <i>thf1-1</i> genotyping     |
| HCF106_qFP                 | CGATTAGAGAGCTACAGGATG                                  | qPCR                         |
| HCF106_qRP                 | GTGATTGTGAATCATTGGGATC                                 | qPCR                         |
| THF1_qFP                   | TGAGGATCCTAAGCAATACCG                                  | qPCR                         |
| THF1_qRP                   | CCGATCCACGCTTTTCTTGTT                                  | qPCR                         |
| UBQ5_qFP                   | AGAAGATCAAGCACAAGCAT                                   | qPCR                         |
| UBQ5_qRP                   | CAGATCAAGCTTCAACTCCT                                   | qPCR                         |
| ACT2_qFP                   | TTGTGCTGGATTCTGGTGATG                                  | qPCR                         |
| ACT2_qRP                   | CGCTCTGCTGTTGTGGTG                                     | qPCR                         |
| ACT7_qFP                   | CATTCAATGTCCCTGCCATGT                                  | qPCR                         |
| ACT7_qRP                   | GGTTGTACGACCACTGGCATAG                                 | qPCR                         |
| HCF106pg_ <i>EcoR</i> I_FP | G GAATTC CGGTCGTTATCTAGTCCAGCT                         | <i>HCF106p:HCF106:3×FLAG</i> |
| HCF106pg_ <i>Sal</i> I_RP  | TTT GTCGAC ATCTTGCCTTGGAGGAGATGC                       | <i>HCF106p:HCF106:3×FLAG</i> |
| THF1pg_ <i>Kpn</i> I_FP    | GG GGTACC AACAACA ACTACATGCTCTGTCT                     | <i>THF1p:THF1:3×FLAG</i>     |
| THF1pg_ <i>Pst</i> I_RP    | TTT CTGCAG AGATTTCCGTTCAACCAAGAAAG                     | <i>THF1p:THF1:3×FLAG</i>     |
| THF1pro_attB1_FP           | GGGGACAAGTTTGTACAAAAAAGCAGGCT GC GATGCTTCCTCTACGTCTCCA | <i>THF1p:GUS</i>             |

|                      |                                                         |                           |
|----------------------|---------------------------------------------------------|---------------------------|
| THF1pro_attB2_RP     | GGGGACCACTTTGTACAAGAAAGCTGGGT C CGCTAAATTGAAGTGAGAAAGAG | <i>THF1p:GUS</i>          |
| HCF106pro_attB1_FP   | GGGGACAAGTTTGTACAAAAAAGCAGGCT GC GATGGTTCATGGTTCCTTTCCT | <i>HCF106p:GUS</i>        |
| HCF106pro_attB2_RP   | GGGGACCACTTTGTACAAGAAAGCTGGGT C GGGCAGCTTCGAAATTGTAATAT | <i>HCF106p:GUS</i>        |
| HCF106 CDS_attB1_FP  | GGGGACAAGTTTGTACAAAAAAGCAGGCT GC ATGGCCATGGCGTTACAGATTA | <i>35S:HCF106:GFP</i>     |
| HCF106 CDS_attB2_RP  | GGGGACCACTTTGTACAAGAAAGCTGGGT C ATCTTGCCTTGGAGGAGATGC   | <i>35S:HCF106:GFP</i>     |
| HCF106pg_attB1_FP    | GGGGACAAGTTTGTACAAAAAAGCAGGCT GC CGGTCGTTATCTAGTCCAGCT  | <i>HCF106p:HCF106:GFP</i> |
| HCF106pg_attB2_RP    | GGGGACCACTTTGTACAAGAAAGCTGGGT CC ATCTTGCCTTGGAGGAGATGC  | <i>HCF106p:HCF106:GFP</i> |
| THF1 CDS_Sal I_FP    | TTT GTCGAC ATGGCTGCAACTGCAATCTCT                        | THF1-NYFP                 |
| THF1 CDS_Kpn I_RP    | GG GGTACC G AGATTTCCGTTCAACCAAGAAAG                     | THF1-NYFP                 |
| HCF106 CDS_Sal I_FP  | TTT GTCGAC ATGGCCATGGCGTTACAGATTA                       | HCF106-CYFP               |
| HCF106 CDS_Kpn I_RP  | GG GGTACC G ATCTTGCCTTGGAGGAGATGC                       | HCF106-CYFP               |
| THF1 CDS_Nde I_FP    | TTT CATATG ATGGCTGCAACTGCAATCTCT                        | MBP-THF1                  |
| THF1 CDS_Sal I_RP    | TTT GTCGAC CTAAGATTTCCGTTCAACCAAGA                      | MBP-THF1                  |
| HCF106 CDS_EcoR I_FP | G GAATTC ATGGCCATGGCGTTACAGATTA                         | His-HCF106                |
| HCF106 CDS_Sal I_RP  | TTT GTCGAC G ATCTTGCCTTGGAGGAGATGC                      | His-HCF106                |
| THF1 CDS_Kpn I_FP    | CGG GGTACC ATGGCTGCAACTGCAATCTCT                        | THF1-NLuc                 |
| THF1 CDS_Sal I_RP    | TTT GTCGAC AGATTTCCGTTCAACCAAGAAAG                      | THF1-NLuc                 |
| HCF106 CDS_Kpn I_FP  | CGG GGTACC ATGGCCATGGCGTTACAGATTA                       | CLuc-HCF106               |
| HCF106 CDS_Pst I_RP  | TTT CTGCAG TCAATCTTGCCTTGGAGGAGAT                       | CLuc-HCF106               |
